# Supplementary material for: Improving the accuracy of template-based predictions by mixing and matching between initial models
Source: PubMed Central journal article supplement (PMC2424052; doi:10.1186/1472-6807-8-24), 2008-05-05
Supplement: 1472-6807-8-24-S1.pdf [file 1472-6807-8-24-S1.pdf]

## Additional file 1

Table 1. Summary of the initial models and the refined CF models for 40 CASP7 targets.

The accuracies are evaluated using the C $\alpha$ RMSD ( $\text{\AA}$ ) between the model and the corresponding experimental structures. The best scoring CF model selected by the discriminatory function RAPDF is referred to “CF-R”; and the best initial model selected by RAPDF is referred to as “IN-R”. For mixing and matching between multiple initial models, the average improvement between CF-R and IN-R is about 0.4  $\text{\AA}$  and the *P*-value from the Wilcoxon sign rank test between CF-R and IN-R is  $7.3 \times 10^{-12}$ . Significant improvements between CF-R and IN-R ( $\geq 0.1$   $\text{\AA}$ ) are observed in 28 of 40 proteins (in bold font). The most substantial improvement is 1.6  $\text{\AA}$ . For mixing and matching between two initial models, the average improvement between the accuracies of CF-R and IN-R is about 0.2  $\text{\AA}$  and the *P*-value between CF-R and IN-R is  $1.1 \times 10^{-5}$ . Significant improvements between CF-R and In-R ( $\geq 0.1$   $\text{\AA}$ ) are observed in 16 of 40 proteins (in bold font). The most substantial improvement is 0.7  $\text{\AA}$ .

| Target  | Mixing and matching between multiple initial models |               |                            |                       | Mixing and matching between two initial models |               |                            |                       |
|---------|-----------------------------------------------------|---------------|----------------------------|-----------------------|------------------------------------------------|---------------|----------------------------|-----------------------|
|         | Best initial model                                  | Best CF model | Best scoring initial model | Best scoring CF model | Best initial model                             | Best CF model | Best scoring initial model | Best scoring CF model |
| T0346   | 0.52                                                | 0.45          | <b>0.68</b>                | <b>0.45</b>           | 0.52                                           | 0.45          | <b>0.63</b>                | <b>0.45</b>           |
| T0290   | 0.63                                                | 0.47          | <b>0.65</b>                | <b>0.50</b>           | 0.63                                           | 0.47          | <b>0.65</b>                | <b>0.48</b>           |
| T0345   | 1.16                                                | 1.16          | <b>1.36</b>                | <b>1.16</b>           | 1.16                                           | 1.16          | 1.16                       | 1.16                  |
| T0315   | 1.31                                                | 1.29          | 1.31                       | 1.29                  | 1.28                                           | 1.27          | 1.31                       | 1.29                  |
| T0305   | 1.37                                                | 1.37          | 1.37                       | 1.38                  | 1.37                                           | 1.33          | 1.37                       | 1.33                  |
| T0302   | 1.6                                                 | 1.62          | <b>1.88</b>                | <b>1.71</b>           | 1.60                                           | 1.66          | <b>1.88</b>                | <b>1.72</b>           |
| T0308   | 1.66                                                | 1.71          | 1.72                       | 1.72                  | 1.72                                           | 1.43          | <b>1.72</b>                | <b>1.44</b>           |
| T0291   | 1.74                                                | 1.61          | <b>3.32</b>                | <b>3.19</b>           | 1.74                                           | 1.61          | <b>3.32</b>                | <b>3.19</b>           |
| T0324   | 1.92                                                | 1.92          | <b>2.38</b>                | <b>2.04</b>           | 1.92                                           | 1.90          | 1.92                       | 1.92                  |
| T0328   | 1.94                                                | 1.85          | 1.94                       | 1.85                  | 1.94                                           | 1.86          | <b>2.11</b>                | <b>1.87</b>           |
| T0340   | 1.94                                                | 2.00          | <b>2.67</b>                | <b>2.03</b>           | 1.94                                           | 2.11          | <b>2.67</b>                | <b>2.12</b>           |
| T0288   | 2.12                                                | 1.99          | <b>2.13</b>                | <b>1.99</b>           | 2.16                                           | 2.16          | 2.16                       | 2.16                  |
| T0303   | 2.20                                                | 2.21          | <b>2.71</b>                | <b>2.21</b>           | 2.20                                           | 2.20          | 2.20                       | 2.20                  |
| T0295   | 2.37                                                | 2.43          | 2.46                       | 2.43                  | 2.45                                           | 2.46          | 2.54                       | 2.47                  |
| T0359   | 2.37                                                | 2.37          | 2.43                       | 2.37                  | 2.37                                           | 2.27          | <b>2.37</b>                | <b>2.27</b>           |
| T0362   | 2.40                                                | 2.01          | <b>3.29</b>                | <b>2.38</b>           | 3.11                                           | 3.07          | 3.11                       | 3.09                  |
| T0335   | 2.45                                                | 2.44          | <b>3.46</b>                | <b>3.08</b>           | 3.04                                           | 3.10          | 3.19                       | 3.19                  |
| T0341   | 2.48                                                | 2.46          | 2.48                       | 2.46                  | 2.48                                           | 2.46          | 2.48                       | 2.48                  |
| T0380   | 2.51                                                | 2.52          | <b>2.87</b>                | <b>2.57</b>           | 2.26                                           | 2.21          | 2.26                       | 2.23                  |
| T0332   | 2.66                                                | 1.94          | <b>2.66</b>                | <b>1.94</b>           | 2.66                                           | 2.44          | <b>2.66</b>                | <b>2.44</b>           |
| T0298   | 2.70                                                | 2.58          | <b>2.82</b>                | <b>2.71</b>           | 2.81                                           | 2.72          | 2.82                       | 2.73                  |
| T0368   | 2.87                                                | 2.85          | <b>4.72</b>                | <b>3.14</b>           | 3.50                                           | 2.91          | <b>3.50</b>                | <b>2.91</b>           |
| T0313   | 3.05                                                | 3.10          | <b>3.21</b>                | <b>3.10</b>           | 3.12                                           | 3.12          | 3.12                       | 3.15                  |
| T0375   | 3.28                                                | 3.26          | <b>3.91</b>                | <b>3.29</b>           | 4.34                                           | 4.26          | 4.34                       | 4.34                  |
| T0373   | 3.56                                                | 3.58          | <b>4.63</b>                | <b>4.48</b>           | 3.61                                           | 3.61          | 3.61                       | 3.61                  |
| T0385   | 3.64                                                | 3.60          | 3.64                       | 3.60                  | 3.64                                           | 3.60          | 3.64                       | 3.64                  |
| T0349   | 3.84                                                | 3.79          | 3.84                       | 3.79                  | 3.84                                           | 3.54          | <b>3.84</b>                | <b>3.56</b>           |
| T0384   | 3.84                                                | 3.86          | <b>4.33</b>                | <b>3.86</b>           | 4.37                                           | 4.61          | 4.61                       | 4.61                  |
| T0330   | 3.99                                                | 3.94          | 4.02                       | 3.94                  | 4.02                                           | 4.12          | 4.02                       | 4.01                  |
| T0317   | 4.18                                                | 4.22          | 4.77                       | 4.78                  | 5.51                                           | 5.49          | <b>5.94</b>                | <b>5.57</b>           |
| T0369   | 4.25                                                | 3.90          | <b>4.25</b>                | <b>4.02</b>           | 4.32                                           | 4.28          | 4.32                       | 4.33                  |
| T0297   | 4.50                                                | 4.50          | <b>5.03</b>                | <b>4.50</b>           | 5.03                                           | 5.02          | 5.03                       | 5.03                  |
| T0331   | 4.68                                                | 4.56          | <b>5.49</b>                | <b>4.60</b>           | 4.86                                           | 4.86          | 4.89                       | 4.86                  |
| T0327   | 4.90                                                | 4.87          | <b>5.61</b>                | <b>4.87</b>           | 4.90                                           | 4.83          | <b>4.95</b>                | <b>4.83</b>           |
| T0348   | 5.82                                                | 5.29          | <b>5.82</b>                | <b>5.29</b>           | 5.82                                           | 5.68          | 5.82                       | 5.93                  |
| T0371   | 6.15                                                | 6.16          | <b>6.82</b>                | <b>6.69</b>           | 6.15                                           | 6.15          | <b>6.87</b>                | <b>6.18</b>           |
| T0383   | 6.26                                                | 6.21          | 6.31                       | 6.22                  | 6.01                                           | 5.90          | 6.03                       | 6.01                  |
| T0312   | 6.63                                                | 6.55          | <b>7.52</b>                | <b>6.55</b>           | 8.30                                           | 8.14          | <b>8.30</b>                | <b>8.14</b>           |
| T0370   | 6.81                                                | 6.52          | <b>7.57</b>                | <b>6.52</b>           | 6.81                                           | 6.51          | <b>6.81</b>                | <b>6.55</b>           |
| T0350   | 7.22                                                | 7.22          | <b>7.97</b>                | <b>7.22</b>           | 5.04                                           | 5.04          | 5.04                       | 5.04                  |
| Average | 3.24                                                | 3.16          | 3.65                       | 3.29                  | 3.36                                           | 3.30          | 3.50                       | 3.33                  |

Table 2. Summary of the initial models and the refined CF models for 40 CASP7 targets.

The accuracies are evaluated using the GDT\_TS scores between the model and the corresponding experimental structures. The best scoring CF model selected by the discriminatory function RAPDF is referred to “CF-R”; and the best initial model selected by RAPDF is referred to as “IN-R”. For mixing and matching between multiple initial models, the average GDT\_TS score is improved from 0.733 to 0.744. The *P*-value from the Wilcoxon sign rank test between CF-R and IN-R is  $8.941 \times 10^{-4}$ . Improvements above 0.01 between CF-R and INR are observed in 21 of 40 proteins (in bold font). For mixing and matching between two initial models, the average GDT\_TS score is improved from 0.732 to 0.737. The *P*-value from the Wilcoxon sign rank test between CF-R and IN-R is 0.025. Improvements above 0.01 between CF-R and IN-R are observed in 9 of 40 proteins (in bold font). The evaluation by GDT\_TS shows similar trend with that observed in the evaluation using C $\alpha$ RMSD calculation.

| Target  | Mixing and matching between multiple initial models |               |                            |                       | Mixing and matching between two initial models |               |                            |                       |
|---------|-----------------------------------------------------|---------------|----------------------------|-----------------------|------------------------------------------------|---------------|----------------------------|-----------------------|
|         | Best initial model                                  | Best CF model | Best scoring initial model | Best scoring CF Model | Best initial model                             | Best CF Model | Best scoring initial model | Best scoring CF model |
| T0346   | 0.990                                               | 0.996         | <b>0.983</b>               | <b>0.996</b>          | 0.990                                          | 0.996         | 0.990                      | 0.996                 |
| T0290   | 0.984                                               | 0.994         | <b>0.984</b>               | <b>0.994</b>          | 0.984                                          | 0.993         | <b>0.984</b>               | <b>0.994</b>          |
| T0345   | 0.961                                               | 0.964         | <b>0.924</b>               | <b>0.962</b>          | 0.961                                          | 0.964         | 0.961                      | 0.962                 |
| T0315   | 0.894                                               | 0.895         | 0.894                      | 0.893                 | 0.901                                          | 0.903         | 0.897                      | 0.900                 |
| T0305   | 0.921                                               | 0.915         | 0.914                      | 0.915                 | 0.914                                          | 0.915         | 0.914                      | 0.915                 |
| T0302   | 0.835                                               | 0.830         | <b>0.790</b>               | <b>0.814</b>          | 0.835                                          | 0.814         | 0.790                      | 0.803                 |
| T0308   | 0.908                                               | 0.904         | 0.901                      | 0.904                 | 0.901                                          | 0.915         | 0.901                      | 0.909                 |
| T0291   | 0.919                                               | 0.917         | 0.900                      | 0.893                 | 0.916                                          | 0.906         | 0.910                      | 0.899                 |
| T0324   | 0.802                                               | 0.797         | <b>0.730</b>               | <b>0.783</b>          | 0.802                                          | 0.802         | 0.802                      | 0.802                 |
| T0328   | 0.819                                               | 0.823         | 0.819                      | 0.820                 | 0.819                                          | 0.818         | <b>0.787</b>               | <b>0.814</b>          |
| T0340   | 0.908                                               | 0.908         | 0.906                      | 0.906                 | 0.908                                          | 0.911         | 0.906                      | 0.908                 |
| T0288   | 0.843                                               | 0.860         | <b>0.843</b>               | <b>0.853</b>          | 0.843                                          | 0.843         | 0.843                      | 0.843                 |
| T0303   | 0.775                                               | 0.779         | <b>0.739</b>               | <b>0.779</b>          | 0.775                                          | 0.779         | 0.775                      | 0.775                 |
| T0295   | 0.766                                               | 0.772         | 0.761                      | 0.770                 | 0.758                                          | 0.764         | <b>0.745</b>               | <b>0.755</b>          |
| T0359   | 0.823                                               | 0.820         | 0.823                      | 0.804                 | 0.809                                          | 0.819         | <b>0.809</b>               | <b>0.819</b>          |
| T0362   | 0.779                                               | 0.786         | <b>0.769</b>               | <b>0.783</b>          | 0.764                                          | 0.766         | 0.764                      | 0.760                 |
| T0335   | 0.714                                               | 0.714         | <b>0.631</b>               | <b>0.655</b>          | 0.655                                          | 0.661         | 0.631                      | 0.631                 |
| T0341   | 0.720                                               | 0.724         | 0.720                      | 0.724                 | 0.720                                          | 0.724         | 0.720                      | 0.720                 |
| T0380   | 0.768                                               | 0.757         | 0.753                      | 0.757                 | 0.773                                          | 0.780         | 0.773                      | 0.780                 |
| T0332   | 0.832                                               | 0.849         | <b>0.832</b>               | <b>0.844</b>          | 0.832                                          | 0.833         | 0.832                      | 0.833                 |
| T0298   | 0.707                                               | 0.717         | <b>0.696</b>               | <b>0.709</b>          | 0.707                                          | 0.717         | <b>0.696</b>               | <b>0.716</b>          |
| T0368   | 0.723                                               | 0.721         | <b>0.649</b>               | <b>0.707</b>          | 0.671                                          | 0.683         | <b>0.671</b>               | <b>0.683</b>          |
| T0313   | 0.793                                               | 0.787         | 0.786                      | 0.787                 | 0.716                                          | 0.717         | 0.716                      | 0.716                 |
| T0375   | 0.640                                               | 0.640         | <b>0.630</b>               | <b>0.640</b>          | 0.612                                          | 0.620         | 0.598                      | 0.598                 |
| T0373   | 0.635                                               | 0.631         | <b>0.594</b>               | <b>0.604</b>          | 0.651                                          | 0.651         | 0.651                      | 0.651                 |
| T0385   | 0.780                                               | 0.797         | <b>0.775</b>               | <b>0.790</b>          | 0.775                                          | 0.790         | 0.775                      | 0.775                 |
| T0349   | 0.662                                               | 0.652         | 0.662                      | 0.649                 | 0.662                                          | 0.659         | 0.662                      | 0.659                 |
| T0384   | 0.699                                               | 0.702         | <b>0.649</b>               | <b>0.702</b>          | 0.646                                          | 0.638         | 0.638                      | 0.638                 |
| T0330   | 0.597                                               | 0.603         | <b>0.597</b>               | <b>0.603</b>          | 0.597                                          | 0.597         | 0.597                      | 0.594                 |
| T0317   | 0.799                                               | 0.799         | 0.793                      | 0.791                 | 0.771                                          | 0.785         | <b>0.766</b>               | <b>0.777</b>          |
| T0369   | 0.619                                               | 0.622         | 0.619                      | 0.622                 | 0.541                                          | 0.529         | 0.541                      | 0.527                 |
| T0297   | 0.687                                               | 0.690         | 0.687                      | 0.681                 | 0.687                                          | 0.691         | 0.687                      | 0.687                 |
| T0331   | 0.692                                               | 0.710         | <b>0.682</b>               | <b>0.705</b>          | 0.664                                          | 0.647         | 0.642                      | 0.642                 |
| T0327   | 0.647                                               | 0.660         | <b>0.638</b>               | <b>0.660</b>          | 0.644                                          | 0.660         | <b>0.631</b>               | <b>0.657</b>          |
| T0348   | 0.578                                               | 0.582         | 0.578                      | 0.582                 | 0.578                                          | 0.578         | 0.578                      | 0.578                 |
| T0371   | 0.614                                               | 0.618         | 0.614                      | 0.604                 | 0.606                                          | 0.608         | 0.606                      | 0.601                 |
| T0383   | 0.528                                               | 0.556         | <b>0.528</b>               | <b>0.556</b>          | 0.564                                          | 0.564         | <b>0.504</b>               | <b>0.544</b>          |
| T0312   | 0.511                                               | 0.470         | 0.511                      | 0.470                 | 0.475                                          | 0.452         | 0.448                      | 0.452                 |
| T0370   | 0.596                                               | 0.600         | <b>0.583</b>               | <b>0.598</b>          | 0.596                                          | 0.600         | 0.596                      | 0.587                 |
| T0350   | 0.433                                               | 0.386         | 0.433                      | 0.386                 | 0.532                                          | 0.532         | 0.532                      | 0.532                 |
| Average | 0.747                                               | 0.749         | 0.733                      | 0.744                 | 0.739                                          | 0.741         | 0.732                      | 0.737                 |
